# Supplementary material for: Fluorinated solvent-assisted photocatalytic aerobic oxidative amidation of alcohols via visible-light-mediated HKUST-1/Cs-POMoW catalysis
Source: Royal Society of Chemistry journal article supplement (doi:10.1039/d1nj02401a), 2021-01-01
Supplement: d1nj02401a1.pdf [file d1nj02401a1.pdf]

## SUPPORTING INFORMATION FOR

### **Fluorinated Solvent-Assisted Photocatalytic Aerobic Oxidative Amidation of Alcohols via Visible-Light-Mediated MOF-POM Catalysis**

**Meghdad Karimi<sup>a,†</sup>, Samira Sadeghi<sup>a,†</sup>, Haleh Mohebali<sup>a,†</sup>, Zahra Azarkhosh<sup>b</sup>, Vahid Safarifard<sup>c</sup>,  
Alireza Mahjoub<sup>a</sup>, Akbar Heydari<sup>a,\*</sup>**

<sup>a</sup>Chemistry Department, Tarbiat Modares University, Tehran, Iran P.O. Box 14155-4838 Tehran, Iran,

Tel: (+98) 21-82883444 E-mail: [heydar\\_a@modares.ac.ir](mailto:heydar_a@modares.ac.ir)

<sup>b</sup>Chemistry Department, Payam-e-Noor University, Golpayegan, Isfahan, Iran.

<sup>b</sup>Department of Chemistry, Iran University of Science and Technology, Tehran 16846-13114, Iran, E-mail : [vsafarifard@iust.ac.ir](mailto:vsafarifard@iust.ac.ir)

## Table of Contents

|                                       |    |
|---------------------------------------|----|
| 1. General procedures for Experiments | S1 |
| 2. Analytical Data                    | S2 |
| 3. References                         | S3 |

### **1. General procedure**

Oxidative amidation of benzyl alcohol was performed according to the following procedure: benzyl alcohol (1mmol), 0.5 mL and 2 mL of HFB (hexafluorobenzene) and acetonitrile, and catalyst (15 mg) were mixed together and stirred for 2 h at room temperature under air balloon and visible light illumination. During the reaction, the temperature was kept constant via a cooling fan under visible light illumination of a 500-W Hg lamp with high pressure. After such a period, amine (1.2 mmol) was also added, and the reaction advancement was checked to utilize TLC after 5h. After assuring the reaction completion, the dilution of the mixture was accomplished with ethyl acetate, and the solid catalyst was also centrifuged and rinsed four times with ethanol. The final mixture was extracted by adding water, and the organic layer was separated by column chromatography.

## 2. Analytical Data

### *N*-allylbenzamide (1a)

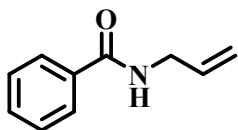

Compound **1a** was prepared according to the general procedure and purified by column chromatography (*n*-Hexane: EtOAc= 4:1) to give 51 % yield. Colorless oil.

Colorless oil.

<sup>1</sup>H NMR (200 MHz, CDCl<sub>3</sub>) δ: 7.80–7.78 (m, 2H), 7.44 (t, *J* = 7.4 Hz, 1H), 7.36 (t, *J* = 7.6 Hz, 2H), 6.92 (br, 1H), 5.92–5.85 (m, 1H), 5.23 (dd, *J*<sub>1</sub> = 17.2 Hz, *J*<sub>2</sub> = 0.8 Hz, 1H), 5.14 (d, *J* = 10.3 Hz, 1H), 4.00 (t, *J* = 5.6 Hz, 2H);

<sup>13</sup>C NMR (75 MHz, CDCl<sub>3</sub>) δ: 168.3, 132.5, 133.3, 131.3, 127.2, 126.2, 115.1, 41.5.

Analytical data was similar to those previously reported.<sup>1</sup>

### *N*-butylbenzamide (1b)

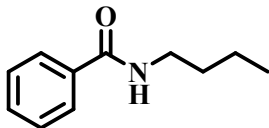

Compound **1b** was prepared according to the general procedure and purified by column chromatography (*n*-Hexane: EtOAc= 4:1) to give 68 % yield. Yellow oil.

<sup>1</sup>H NMR (CDCl<sub>3</sub>, 200 MHz): δ (ppm) = 7.98-8.01 (m, 2H), 7.42-7.18 (m, 3H), 6.31 (br s, 1H), 3.39-3.41 (q, 2H, *J* = 6.8 Hz), 1.55-1.47 (m, 2H), 1.35-1.27 (m, 2H), 0.92-0.85 (t, 3H, *J* = 7.0 Hz).

Analytical data was similar to those previously reported.<sup>2</sup>

### (*R*)-*N*-(1-hydroxybutan-2-yl)benzamide (1c)

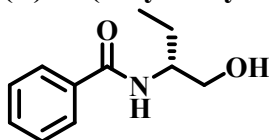

Compound **1c** was prepared according to the general procedure and purified by column chromatography (*n*-Hexane: EtOAc= 4:1) to give 72 % yield. M.p. 72-74 °C (lit. 76 °C)

<sup>1</sup>H NMR (CDCl<sub>3</sub>, 200 MHz): δ (ppm) = 7.73-7.66 (m, 2H), 7.41-7.29 (m, 3H), 6.33 (s, 1H), 4.01 (br s, 1H), 3.72-3.59 (dd, 2H, *J* = 10.8, 2.6 Hz), 2.97-3.00 (br s, 1H), 1.52-1.67 (m, 2H), 0.95-0.93 (t, 3H, *J*=7.0Hz).

<sup>13</sup>C NMR (CDCl<sub>3</sub>, 75 MHz): δ (ppm) = 168.3, 134.4, 131.6, 128.6, 127.0, 65.2, 53.7, 24.3, 10.7.

Analytical data was similar to those previously reported.<sup>3</sup>

***tert*-butyl benzoyl-*L*-phenylalaninate (1d)**

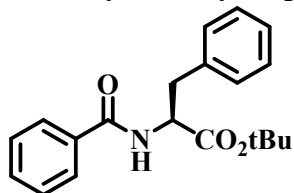

Compound **1d** was prepared according to the general procedure and purified by column chromatography (*n*-Hexane: EtOAc= 4:1) to give 82 % yield. M.p. 75–79 °C (lit. 60 °C).

**<sup>1</sup>H NMR (CDCl<sub>3</sub>, 200 MHz):** δ (ppm) = 7.70-7.54 (m, 2H), 7.43-7.22 (m, 3H), 7.22-7.05 (m, 5H), 6.64 (d, 1H, *J* = 7.3 Hz), 4.90 (dt, 1H, *J* = 7.4, 5.8 Hz), 3.12 (d, 2H, *J* = 5.7 Hz), 1.32 (s, 9H).

**<sup>13</sup>C NMR (CDCl<sub>3</sub>, 75 MHz):** δ (ppm) = 172.9, 165.6, 133.1, 132.7, 130.9, 128.8, 127.6, 127.1, 126.0, 81.4, 53.2, 36.7, 27.5.

Analytical data was similar to those previously reported.<sup>4</sup>

***N*-benzylbenzamide (1e)**

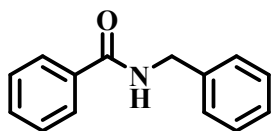

Compound **1e** was prepared according to the general procedure and purified by column chromatography (*n*-Hexane: EtOAc= 4:1) to give 91 % yield. M.p. 103–106 °C (lit. 104 °C).

**<sup>1</sup>H NMR (CDCl<sub>3</sub>, 200 MHz):** δ (ppm) = 7.80-7.63 (m, 2H), 7.50-7.23 (m, 8H), 6.36 (br s, 1H), 4.65-4.62 (d, 2H, *J* = 5.5 Hz).

Analytical data was similar to those previously reported.<sup>5</sup>

**(*S*)-*N*-(1-phenylethyl)benzamide (1f)**

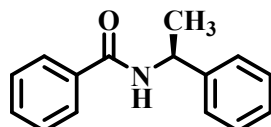

Compound **1f** was prepared according to the general procedure and purified by column chromatography (*n*-Hexane: EtOAc= 4:1) to give 93 % yield. M.p. 120–123 °C (lit. 123 °C).

**<sup>1</sup>H NMR (CDCl<sub>3</sub>, 200 MHz):** δ (ppm) 7.82-7.80 (m, 2H), 7.58-7.33 (m, 8H), 6.31 (d, *J* = 7.0 Hz, 1H), 5.30 (q, *J* = 7.2 Hz, 1H), 1.61 (d, *J* = 7.1 Hz, 3H).

**<sup>13</sup>C NMR (CDCl<sub>3</sub>, 75 MHz):** δ (ppm) = 163.5, 141.1, 132.5, 129.7, 126.6, 126.1, 125.5, 125.1, 124.7, 50.2, 20.9.

Analytical data was similar to those previously reported.<sup>6</sup>

**phenyl(piperidin-1-yl)methanone (1g)**

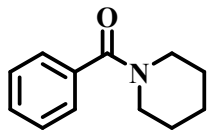

Compound **1g** was prepared according to the general procedure and purified by column chromatography (*n*-Hexane: EtOAc= 4:1) to give 75 % yield. Colorless oil.

$^1\text{H NMR}$  ( $\text{CDCl}_3$ , 200 MHz):  $\delta$  (ppm) = 7.41 (s, 5H), 3.74 (s, 2H), 3.50 (s, 2H), 1.42-1.65 (m, 6H).

$^{13}\text{C NMR}$  ( $\text{CDCl}_3$ , 75 MHz):  $\delta$  (ppm) = 171.5, 137.4, 130.3, 128.9, 126.2, 47.1, 42.3, 25.5, 24.6, 23.9.

Analytical data was similar to those previously reported.<sup>7</sup>

**morpholino(phenyl)methanone (1h)**

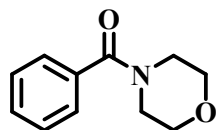

Compound **1h** was prepared according to the general procedure and purified by column chromatography (*n*-Hexane: EtOAc= 4:1) to give 67 % yield. Colorless oil.

$^1\text{H NMR}$  ( $\text{CDCl}_3$ , 200 MHz):  $\delta$  (ppm) = 7.42 (s, 5H), 3.68 (br s, 2H), 3.48 (br s, 2H).

$^{13}\text{C NMR}$  ( $\text{CDCl}_3$ , 75 MHz):  $\delta$  (ppm) = 171.7, 134.9, 131.7, 129.0, 128.1, 65.0.

Analytical data was similar to those previously reported.<sup>7</sup>

***N,N*-diallylbenzamide (1i)**

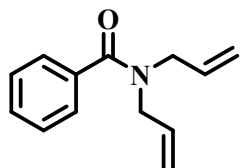

Compound **1i** was prepared according to the general procedure and purified by column chromatography (*n*-Hexane: EtOAc= 4:1) to give 53 % yield. Yellow oil.

$^1\text{H NMR}$  ( $\text{CDCl}_3$ , 200 MHz):  $\delta$  (ppm) = 7.42-7.39 (s, 5H), 5.91 (br s, 1H), 5.76 (br s, 1H), 5.24-5.20 (s, 4H), 4.17 (s, 2H), 3.86 (s, 2H).

$^{13}\text{C NMR}$  ( $\text{CDCl}_3$ , 75 MHz):  $\delta$  (ppm) = 172.9, 137.2, 134.1, 133.1, 130.0, 129.1, 127.8, 118.0, 50.9, 47.7.

Analytical data was similar to those previously reported.<sup>3</sup>

**methyl benzoyl-*L*-prolinate (1j)**

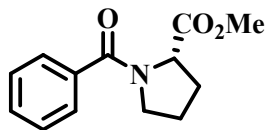

Compound **1j** was prepared according to the general procedure and purified by column chromatography (*n*-Hexane: EtOAc= 4:1) to give 70 % yield. M.p. 87-90 °C (Lit. 91 °C).

<sup>1</sup>H NMR (CDCl<sub>3</sub>, 200 MHz): δ (ppm) = 7.59-7.56 (m, 2H), 7.46-7.36 (m, 3H), 4.70-4.55 (dd, 1H (79%), *J* = 7.5, 4.4 Hz), 4.35 (d, 1H (21%), *J* = 8.5 Hz), 3.82-3.70 (s, 3H (78%)), 3.56-3.55 (s, 3H (20%)), 3.70-3.42 (m, 2H), 2.33-2.28 (m, 1H), 2.07-1.87 (m, 3H).

<sup>13</sup>C NMR (CDCl<sub>3</sub>, 75 MHz): δ (ppm) = 173.9, 170.9, 134.2, 131.2, 129.1, 128.5, 60.1, 51.7, 51.0, 30.2, 27.6.

Analytical data was similar to those previously reported.<sup>8</sup>

***N*-benzyl-*N*-isopropylbenzamide (1k)**

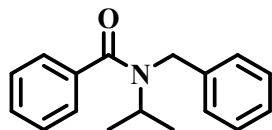

Compound **1k** was prepared according to the general procedure and purified by column chromatography (*n*-Hexane: EtOAc= 4:1) to give a 59 % yield. Yellow oil.

<sup>1</sup>H NMR (CDCl<sub>3</sub>, 200 MHz): δ (ppm) = 7.46 (m, 5H), 7.38-7.26 (m, 5H), 4.81 (br s, 2H), 4.18 (br s, 1H), 1.22 (s, 6H).

<sup>13</sup>C NMR (CDCl<sub>3</sub>, 75 MHz): δ (ppm) = 168.9, 142.2, 136.5, 131.8, 127.6, 126.4, 126.0, 125.5, 125.0, 47.1, 20.7.

Analytical data was similar to those previously reported.<sup>3</sup>

***N,N*-dibenzylbenzamide (1l)**

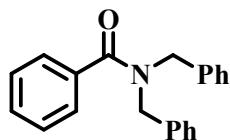

Compound **1l** was prepared according to the general procedure and purified by column chromatography (*n*-Hexane: EtOAc= 4:1) to give 60 % yield. M.p. 93-97 °C (Lit. 96-97 °C)

<sup>1</sup>H NMR (CDCl<sub>3</sub>, 200 MHz): δ (ppm) = 7.55-7.29 (m, 7H), 7.18 (s, 1H), 4.72 (s, 2H), 4.44 (s, 2H).

<sup>13</sup>C NMR (CDCl<sub>3</sub>, 75 MHz): δ (ppm) = 173.5, 137.8, 137.1, 135.8, 130.1, 127.1, 126.7, 125.9, 125.2, 124.8, 54.3, 45.4.

Analytical data was similar to those previously reported.<sup>9</sup>

**(S)-4-methoxy-N-(1-phenylethyl)benzamide (1m)**

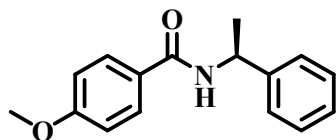

Compound **1m** was prepared according to the general procedure and purified by column chromatography (*n*-Hexane: EtOAc= 4:1) to give 66 % yield. M.p. 130-134 °C.

<sup>1</sup>H NMR (CDCl<sub>3</sub>, 200 MHz): δ (ppm) = 7.81-7.77 (d, 2H, *J* = 8.3 Hz), 7.46-7.24 (m, 9H), 6.28 (d, 1H, *J* = 6.8 Hz), 5.40-5.33 (m, 1H), 2.42 (s, 3H), 1.66-1.62 (d, 3H, *J* = 7.1 Hz).

Analytical data was similar to those previously reported.<sup>10</sup>

**(S)-4-nitro-N-(1-phenylethyl)benzamide (1n)**

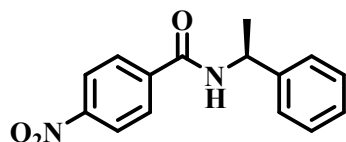

Compound **1n** was prepared according to the general procedure and purified by column chromatography (*n*-Hexane: EtOAc= 4:1) to give 83 % yield. M.p. 134-136 °C (Lit. 136-138 °C).

<sup>1</sup>H NMR (CDCl<sub>3</sub>, 200 MHz): δ (ppm) = 8.33-8.15 (m, 2H), 8.00-7.85 (m, 2H), 7.45-7.29 (m, 5H), 6.72 (d, 1H, *J* = 7.3 Hz), 5.33 (p, 1H, *J* = 7.0 Hz), 1.59 (d, 3H, *J* = 6.9 Hz).

Analytical data was similar to those previously reported.<sup>11</sup>

**(S)-4-methyl-N-(1-phenylethyl)benzamide (1o)**

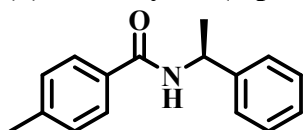

Compound **1o** was prepared according to the general procedure and purified by column chromatography (*n*-Hexane: EtOAc= 4:1) to give 65 % yield. M.p. 131-134 °C.

<sup>1</sup>H NMR (CDCl<sub>3</sub>, 200 MHz): δ (ppm) = 7.76-7.73 (d, 2H, *J* = 9 Hz), 7.36-7.23 (m, 6H), 6.95-6.90 (m, 2H), 6.27 (d, 1H, *J* = 7.3 Hz), 5.34-5.28 (p, 1H, *J* = 6.9 Hz), 3.82 (s, 3H), 1.64-1.64 (d, 3H, *J* = 6.8 Hz).

Analytical data was similar to those previously reported.<sup>10</sup>



***N*-benzyl-3-phenylpropanamide (1p)**

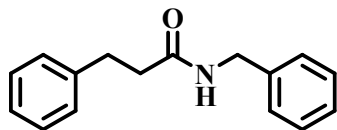

Compound **1p** was prepared according to the general procedure and purified by column chromatography (*n*-Hexane: EtOAc= 4:1) to give 41 % yield. M.p. 77–81 °C (lit. 80 °C).

**<sup>1</sup>H NMR (200 MHz, CDCl<sub>3</sub>):**  $\delta$  = 7.40–7.15 (m, 10 H), 5.57 (br s, 1 H), 4.40 (d, *J* = 5.7 Hz, 2 H), 3.05 (t, *J* = 7.6 Hz, 2 H), 2.52 (t, *J* = 7.6 Hz, 2 H) ppm;

Analytical data was similar to those previously reported.<sup>12</sup>

***N*-benzyloctanamide (1q)**

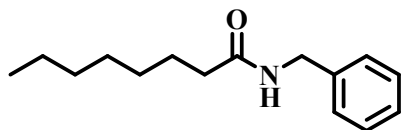

Compound **1q** was prepared according to the general procedure and purified by column chromatography (*n*-Hexane: EtOAc= 4:1) to give 32 % yield. Yellow oil.

**<sup>1</sup>H NMR (200 MHz, CDCl<sub>3</sub>):**  $\delta$  = 7.33–7.24 (m, 6 H), 5.76 (br s, 1 H), 4.40 (d, *J* = 5.5 Hz, 2 H), 3.21 (td, *J* = 7.2, 5.9 Hz, 2H, 3), 1.95 (s, 3H, 1), 1.50 – 1.44 (m, 2H, 4), 1.32 – 1.25 (m, 6H, 5-7), 0.86 (t, *J* = 6.7 Hz, 3H, 8)

Analytical data was similar to those previously reported.<sup>13</sup>

### 3. References

1. L. Zou, P. Li, B. Wang and L. Wang, *Green Chemistry*, 2019, **21**, 3362-3369.
2. Y. Wang, D. Zhu, L. Tang, S. Wang and Z. Wang, *Angewandte Chemie International Edition*, 2011, **50**, 8917-8921.
3. D. Saberi and A. Heydari, *Applied Organometallic Chemistry*, 2014, **28**, 101-108.
4. H.-g. Park, M.-J. Kim, M.-K. Park, H.-J. Jung, J. Lee, S.-h. Choi, Y.-J. Lee, B.-S. Jeong, J.-H. Lee and M.-S. Yoo, *The Journal of organic chemistry*, 2005, **70**, 1904-1906.
5. T. Maki, K. Ishihara and H. Yamamoto, *Organic letters*, 2006, **8**, 1431-1434.
6. C. K. De, E. G. Klauber and D. Seidel, *Journal of the American Chemical Society*, 2009, **131**, 17060-17061.
7. T. Ohshima, T. Iwasaki, Y. Maegawa, A. Yoshiyama and K. Mashima, *Journal of the American Chemical Society*, 2008, **130**, 2944-2945.
8. W.-R. Li, Y.-C. Yo and Y.-S. Lin, *Tetrahedron*, 2000, **56**, 8867-8875.
9. J. Pan, N. O. Devarie-Baez and M. Xian, *Organic letters*, 2011, **13**, 1092-1094.
10. M. Karimi, L. Ghandi, D. Saberi and A. Heydari, *New Journal of Chemistry*, 2018, **42**, 3900-3908.
11. Z. Wang, Y. Zhang, H. Fu, Y. Jiang and Y. Zhao, *Organic letters*, 2008, **10**, 1863-1866.
12. I. Shiina and Y.-i. Kawakita, *Tetrahedron*, 2004, **60**, 4729-4733.
13. V. T. Pérez, L. A. Ticona, A. M. Serban, J. A. Gómez and Á. R. Sánchez, *RSC Medicinal Chemistry*, 2020, **11**, 1196-1209.
